# Supplementary material for: Weighted Mask R‐CNN for Improving Adjacent Boundary Segmentation
Source: Hindawi journal article supplement (doi:10.1155/2021/8872947), 2021-01-01
Supplement: f1 [file 8872947.f1.pdf]

# Supplementary Material

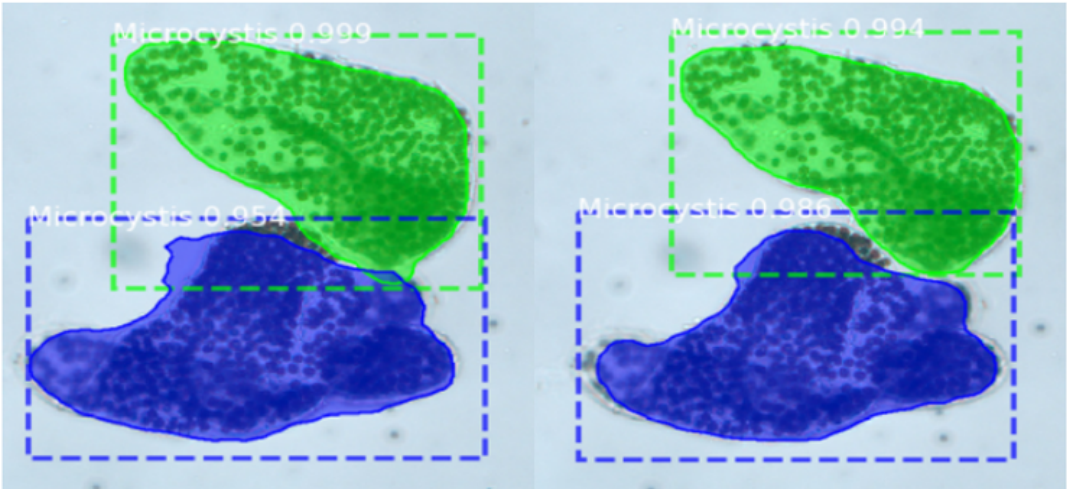

Figure S1. The instance segmentation examples of Mask R-CNN (left) and Weighted R-CNN (right).

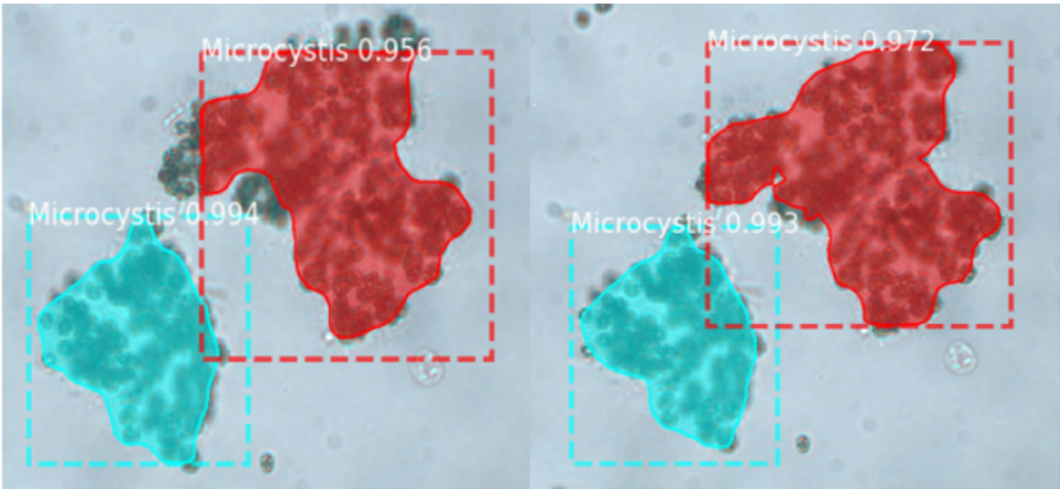

Figure S2. The instance segmentation examples of Mask R-CNN (left) and Weighted R-CNN (right).

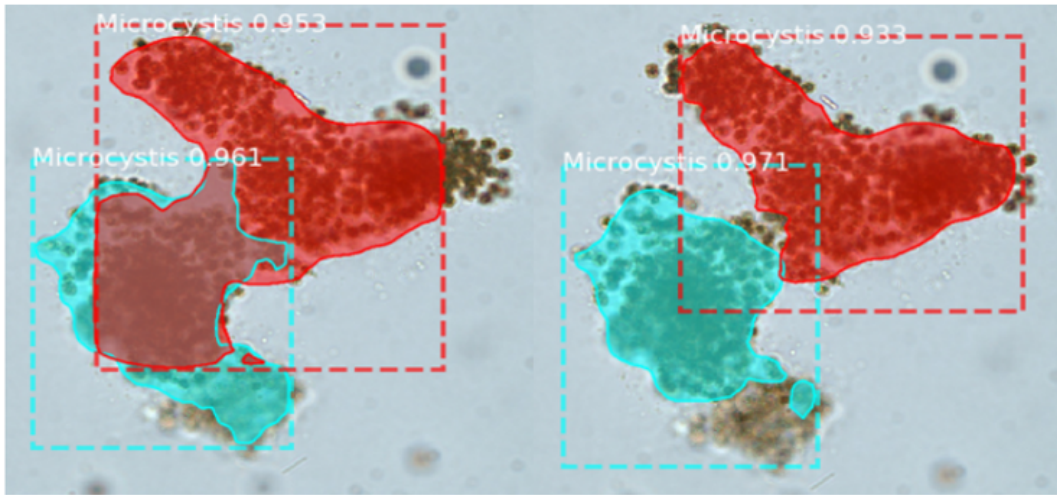

Figure S3. The instance segmentation examples of Mask R-CNN (left) and Weighted R-CNN (right).

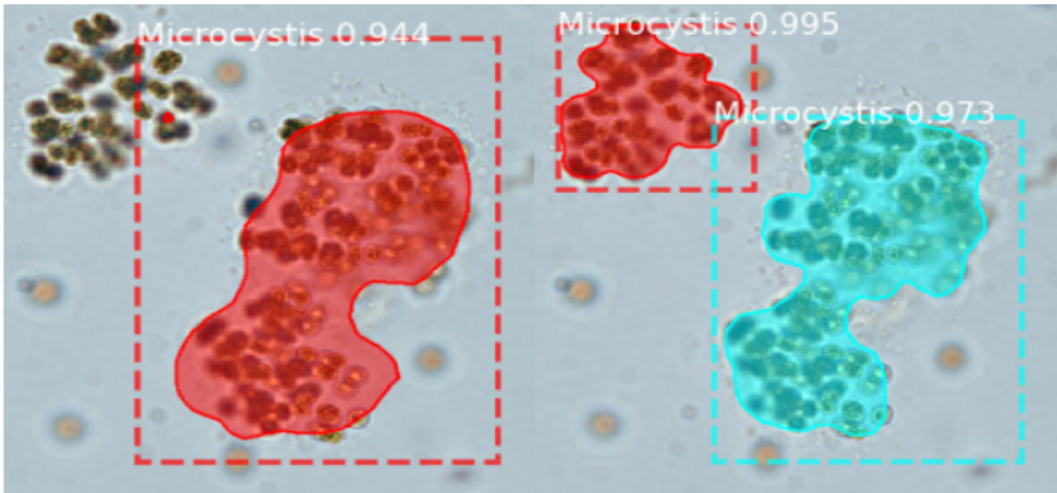

Figure S4. The instance segmentation examples of Mask R-CNN (left) and Weighted R-CNN (right).

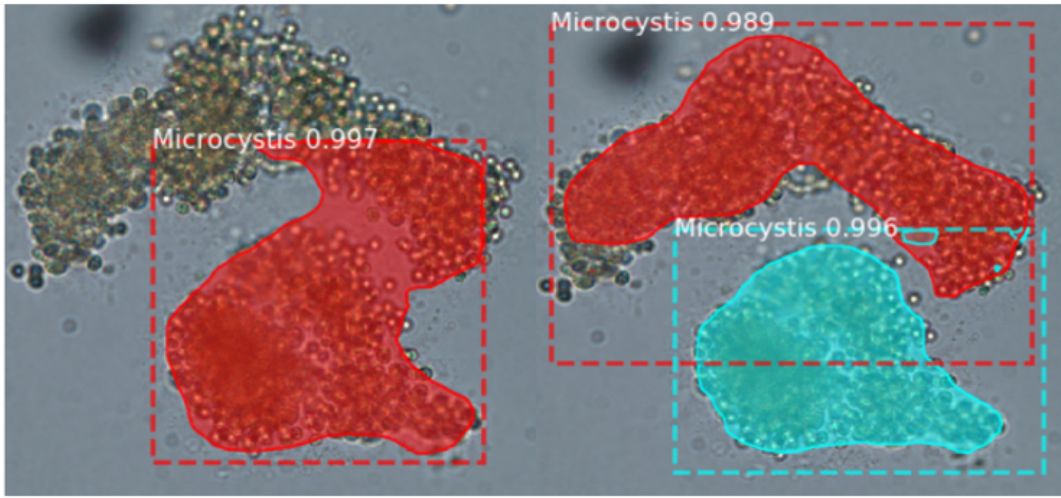

Figure S5. The instance segmentation examples of Mask R-CNN (left) and Weighted R-CNN (right).

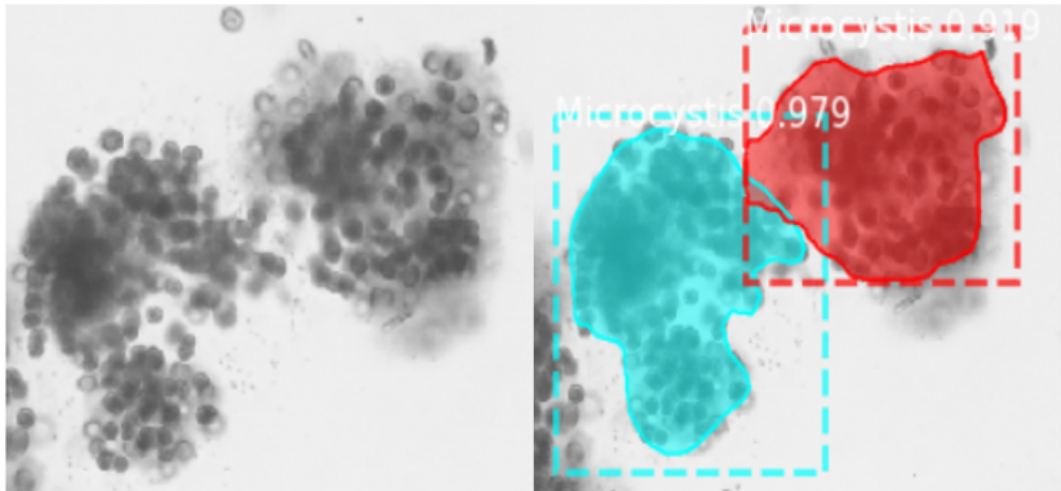

Figure S6. The instance segmentation examples of Mask R-CNN (left) and Weighted R-CNN (right).

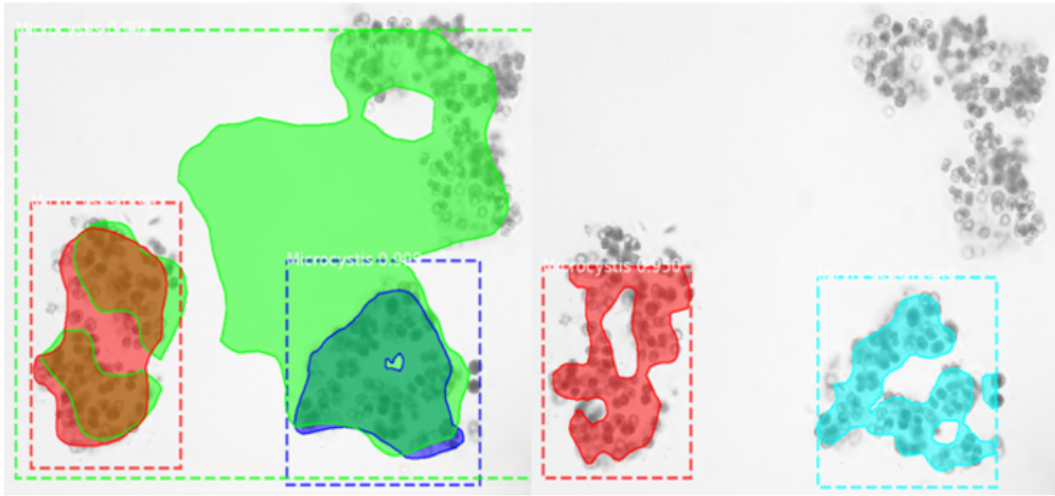

Figure S7. The instance segmentation examples of Mask R-CNN (left) and Weighted R-CNN (right).

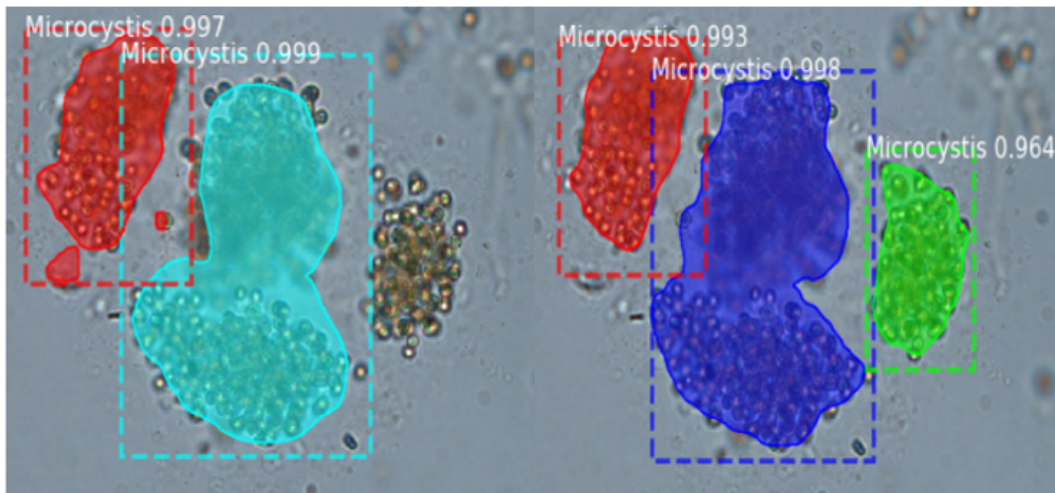

Figure S8. The instance segmentation examples of Mask R-CNN (left) and Weighted R-CNN (right).

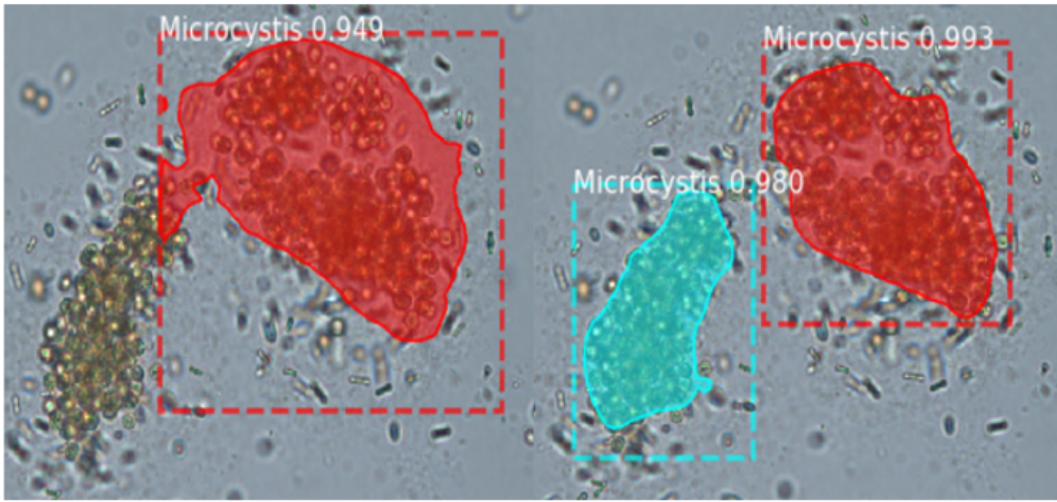

Figure S9. The instance segmentation examples of Mask R-CNN (left) and Weighted R-CNN (right).

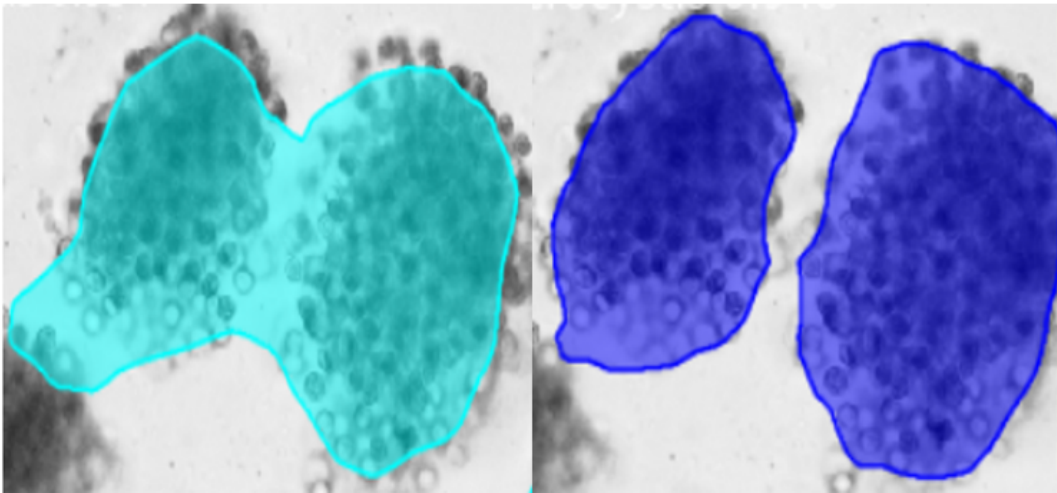

Figure S10. The instance segmentation examples of Mask R-CNN (left) and Weighted R-CNN (right).

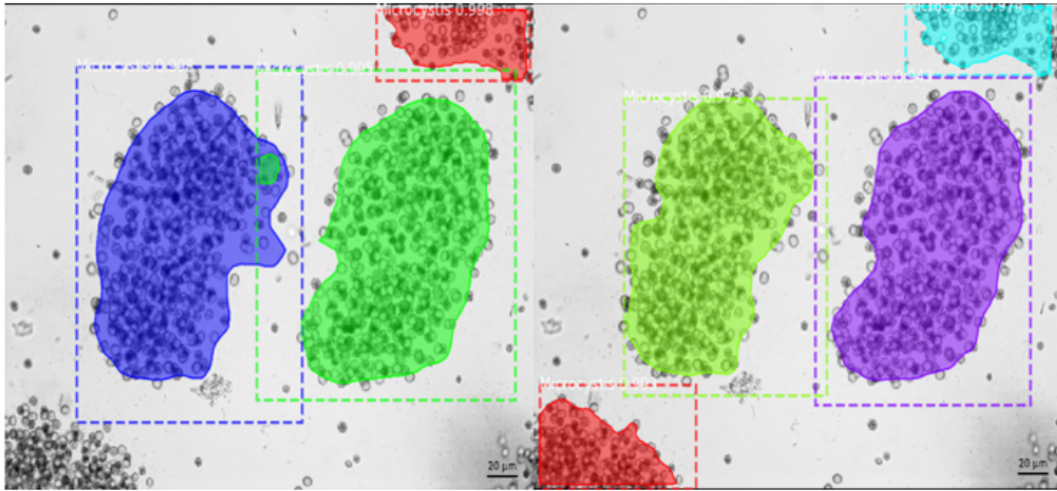

Figure S11. The instance segmentation examples of Mask R-CNN (left) and Weighted R-CNN (right).

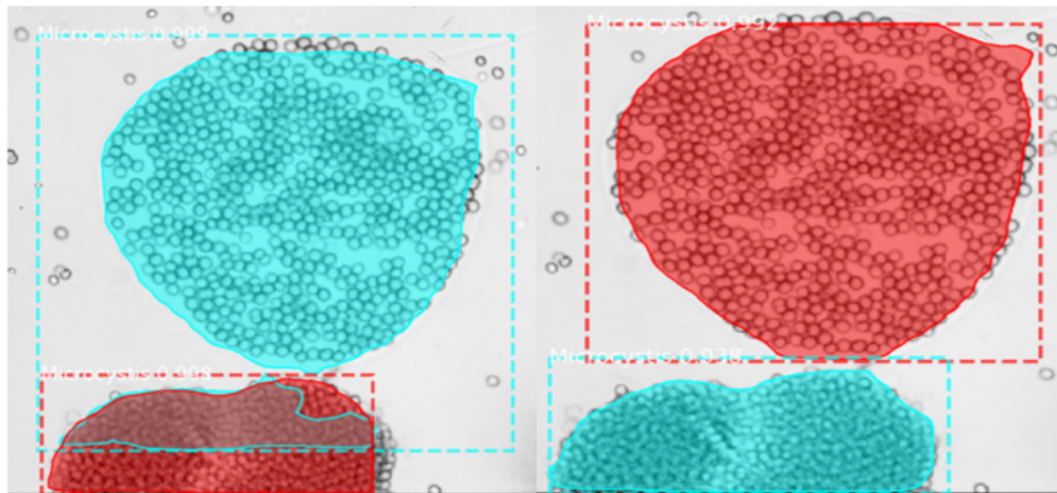

Figure S12. The instance segmentation examples of Mask R-CNN (left) and Weighted R-CNN (right).
